# Supplementary material for: RNA-seq data from C-X-C chemokine receptor type 5 (CXCR5) gene knockout aged mice with retinal degeneration phenotype
Source: PubMed Central journal article supplement — Data Brief. 2020 Jun 21;31:105915. doi: 10.1016/j.dib.2020.105915 (PMC7334305; doi:10.1016/j.dib.2020.105915), 2020-06-21
Supplement: mmc3.pdf [file mmc3.pdf]

Dear Data in Brief manuscript administration,

I, Dmitry Rumyancev, passport number 14 13 336996 (Russia) residing in Belgorod City, Shchors st 39B, apt 51, Belgorod Region, Russa, have designed scientific artwork on behalf of the authors Madhu Sudhana Saddala, Anton Lennikov, and Hu Huang at Mason Eye Institute, University of Missouri, Columbia, Missouri, United States of America

Please find the copyright transfer letter for the artwork assets in the manuscript DIB-D-20-00369 “Comparative transcriptome profiling datasets of RPE/choroid and retina in aged CXCR5 knockout and C57BL6” revised title “RNA-seq data from C-X-C chemokine receptor type 5 (CXCR5) gene knockout aged mice with retinal degeneration phenotype” recently submitted to Data in Brief as DIB-D-20-00369.

I confirm the authorship of artwork assets used in Figure 1 of the above-mentioned manuscript designed on behalf of authors. Should the manuscript DIB-D-20-00369 to be accepted I grant the permission to “Data in Brief,” part of the Elsevier Publishing Group to publish the assets in all print, digital any other applicable formats under open-access license Attribution 4.0 International (CC BY 4.0)

Please don't hesitate to contact me directly if you need any additional information or documents, as well as a different type of license required to be granted.

Kind regards,

Dmitry Rumyancev

Freelance scientific artist

[Dmitry\\_r75@mail.ru](mailto:Dmitry_r75@mail.ru)

+7-962-300-9443

A handwritten signature in black ink, appearing to be 'DR' or similar initials, written in a cursive style.
